# Supplementary material for: Two novel structures based on an organic ligand with two different coordination modes
Source: Royal Society of Chemistry journal article supplement (doi:10.1039/c5ra05603a), 2015-01-01
Supplement: c5ra05603a1.pdf [file c5ra05603a1.pdf]

**Table s1. BVS calculation results of tungsten atoms in compound 1.**

| Atom      | W1   | W2   | W3   | W4   | W5   | W6   | W7   | W8   | W9   | W10  | W11  | W12  | Sum  |
|-----------|------|------|------|------|------|------|------|------|------|------|------|------|------|
| BVS value | 6.01 | 5.96 | 5.99 | 5.92 | 6.01 | 6.07 | 5.99 | 5.94 | 6.03 | 6.03 | 6.08 | 5.97 | 72.0 |

The equation used is “Bond valence =  $10^{(-0.5 \times (R - R_0)/R)}$ ”, and  $R_0 = 1.91$ .

**Table s2. BVS calculation results of tungsten atoms in compound 2**

| Atom      | W1   | W2   | W3   | W4   | W5   | W6   | Sum  |
|-----------|------|------|------|------|------|------|------|
| BVS value | 6.03 | 5.96 | 5.95 | 5.99 | 5.93 | 6.02 | 35.9 |

The equation used is “Bond valence =  $10^{(-0.5 \times (R - R_0)/R)}$ ”, and  $R_0 = 1.91$ .

## Synthesis discussion:

### 1. For compound 1:

The same procedure with  $\text{AgNO}_3$  (0.134g, 0.789mmol) used in place of  $\text{AgNO}_3$  (0.101g, 0.595mmol) has been done, and we only obtained some crystals unsuitable for crystal analysis. The same procedure with Hbzmd (0.033g, 0.094mmol) instead of Hbzmd (0.05g, 0.142mmol) has been done, and we only obtained some unidentified amorphous materials.

The same procedure with both  $\text{H}_4[\text{SiW}_{12}\text{O}_{40}] \cdot x\text{H}_2\text{O}$  (0.496g, 0.172mmol) and isonicotinic acid (0.10g, 0.812mmol) replacing  $\text{H}_4[\text{SiW}_{12}\text{O}_{40}] \cdot x\text{H}_2\text{O}$  (0.5g, 0.174mmol) and isonicotinic acid (0.107g, 0.869mmol) hse been done, and we also only obtained some crystals unsuitable for crystal analysis.

### 2. For compound 2:

The same procedure with only  $\text{H}_3[\text{PW}_{12}\text{O}_{40}] \cdot x\text{H}_2\text{O}$  (0.33g, 0.115mmol) taking the place of  $\text{H}_3[\text{PW}_{12}\text{O}_{40}] \cdot x\text{H}_2\text{O}$  (0.5g, 0.174mmol) has been carried out, and we only obtained some crystals unsuitable for crystal analysis. The same procedure with both isonicotinic acid (0.12g, 0.975mmol) and Hbzmd (0.05g, 0.142mmol) replaced by isonicotinic acid (0.107g, 0.869mmol) and Hbzmd (0.033g, 0.093mmol) and with both  $\text{H}_3[\text{PW}_{12}\text{O}_{40}] \cdot x\text{H}_2\text{O}$  (0.5g, 0.174mmol) and isonicotinic acid (0.12g, 0.975mmol) replaced by  $\text{H}_3[\text{PW}_{12}\text{O}_{40}] \cdot x\text{H}_2\text{O}$  (0.33g, 0.115mmol) and isonicotinic acid (0.10g, 0.812mmol) have also been done, and we only obtained some unidentified amorphous materials.

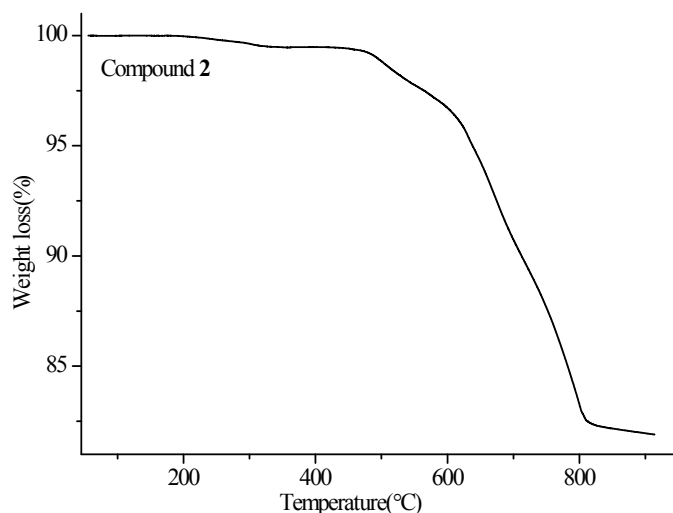

Fig. s1 TG curve for compound 2.

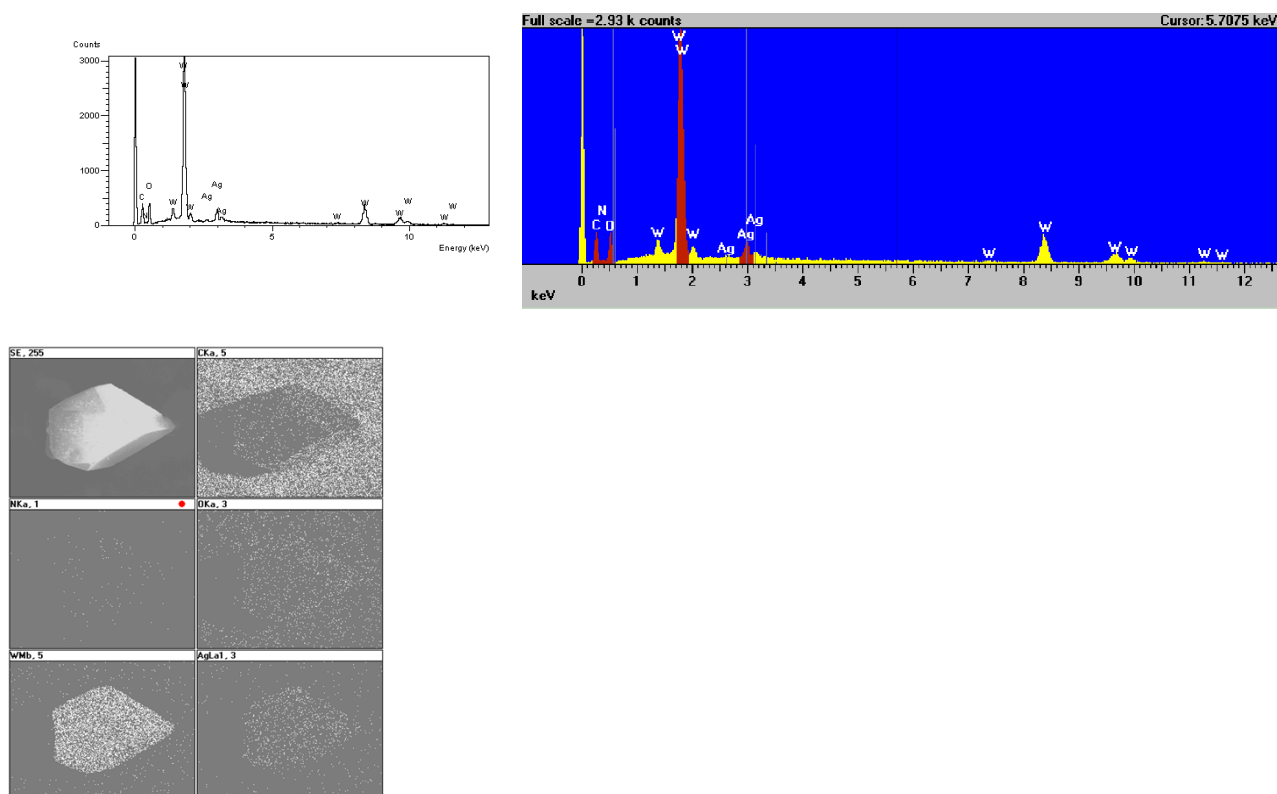

Fig. s2 EDS spectrum for compound 2.

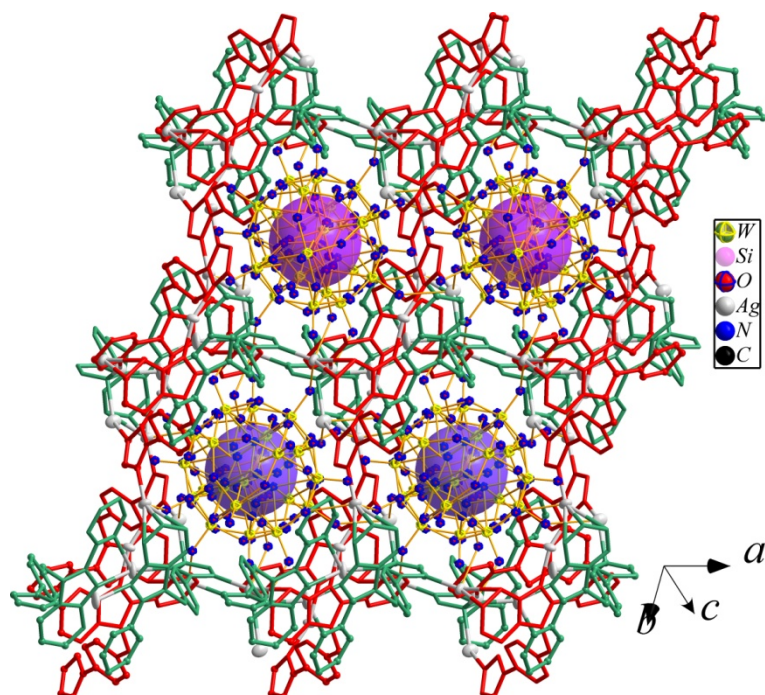

Fig. s3 representation of the 3-D POMMOF in compound 1. N(1) bzmd is in red, and N(8) bzmd is in green, Si(1) centered POM are in pink, and Si(2) centered POM are in blue.

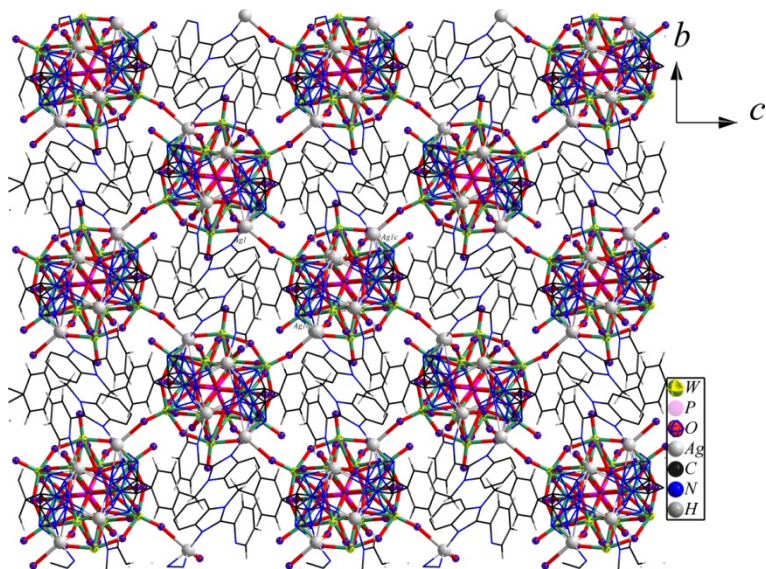

Fig. s4 representation of the 3-D POMMOF in compound 2.

## Characterizations of compounds.

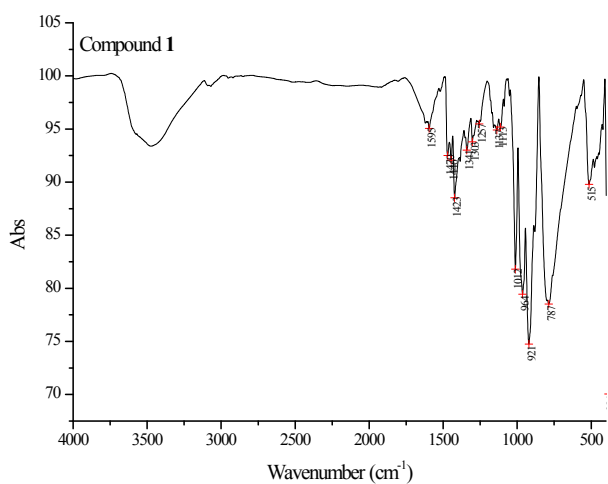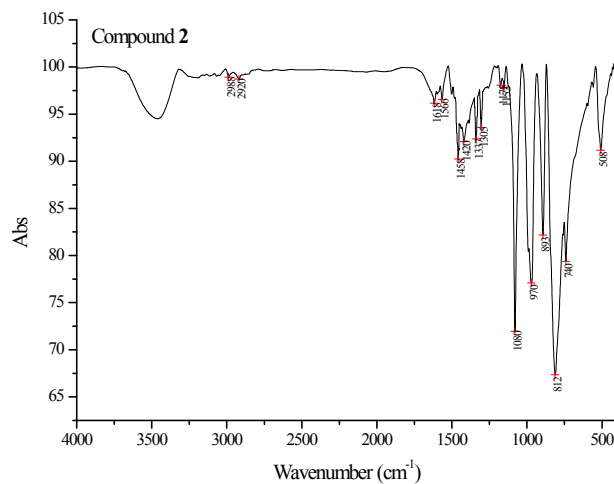

Fig. s5 IR spectra of compounds 1 and 2.

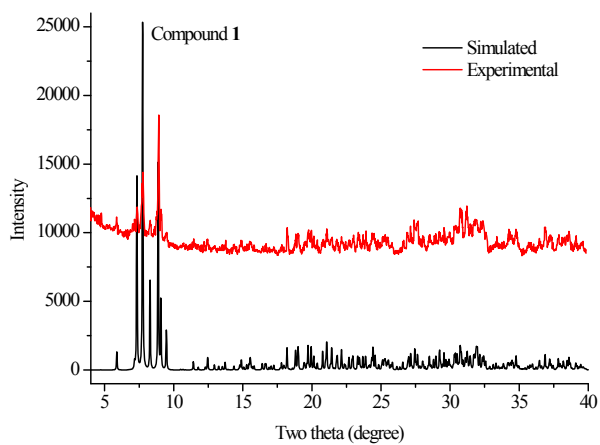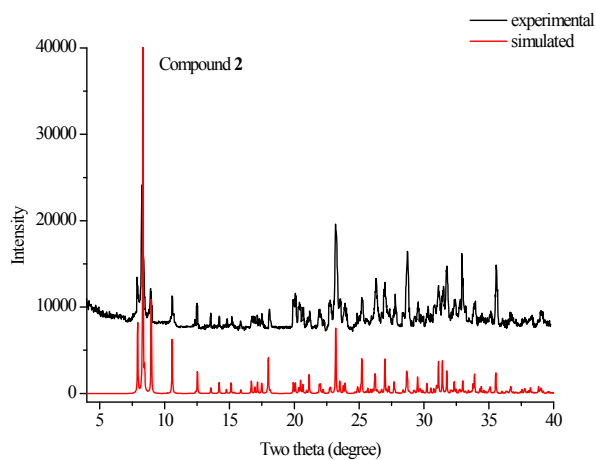

Fig. s6 experimental and simulated XRD patterns of compounds 1 and 2.

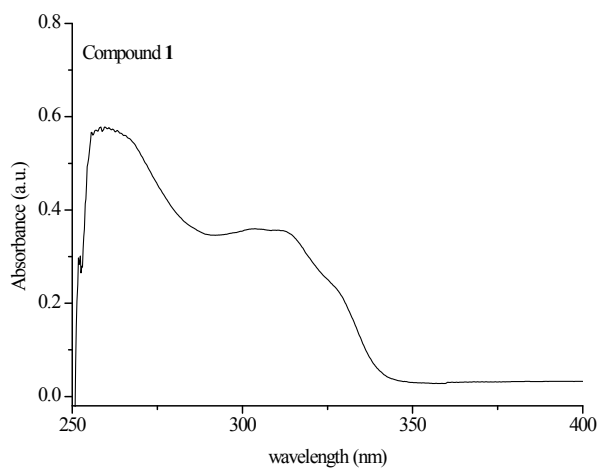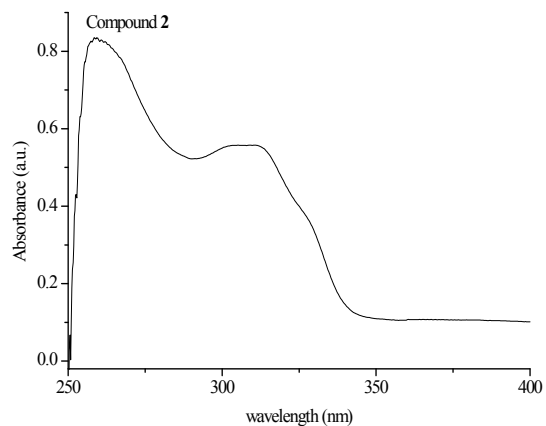

Fig. s7. UV spectra of compounds **1** and **2**.

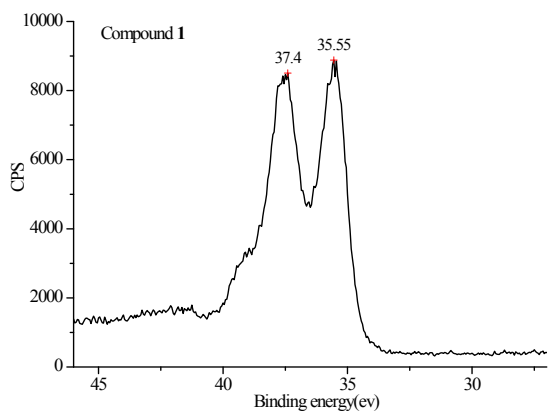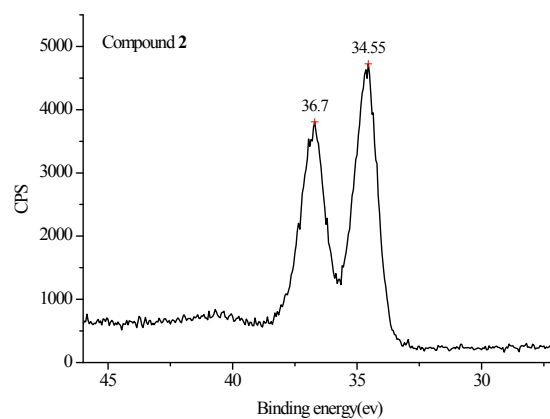

Fig. s8 XPS spectra of compound **1** (a) and compound **2** (b).

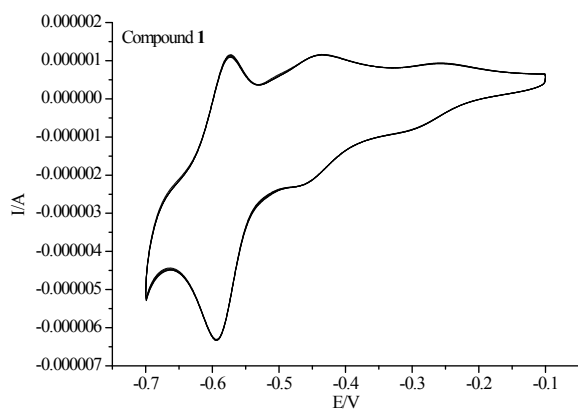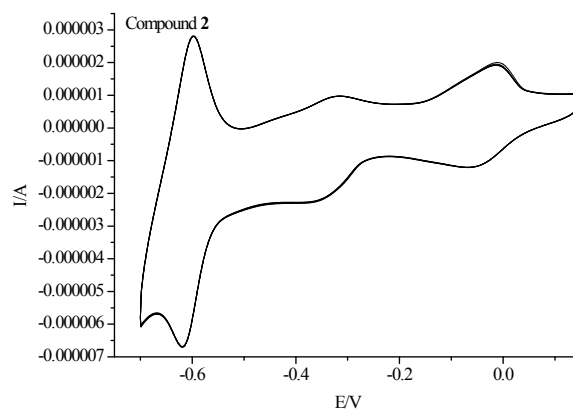

Fig. s9 cyclic voltammograms of compounds **1** and **2**.

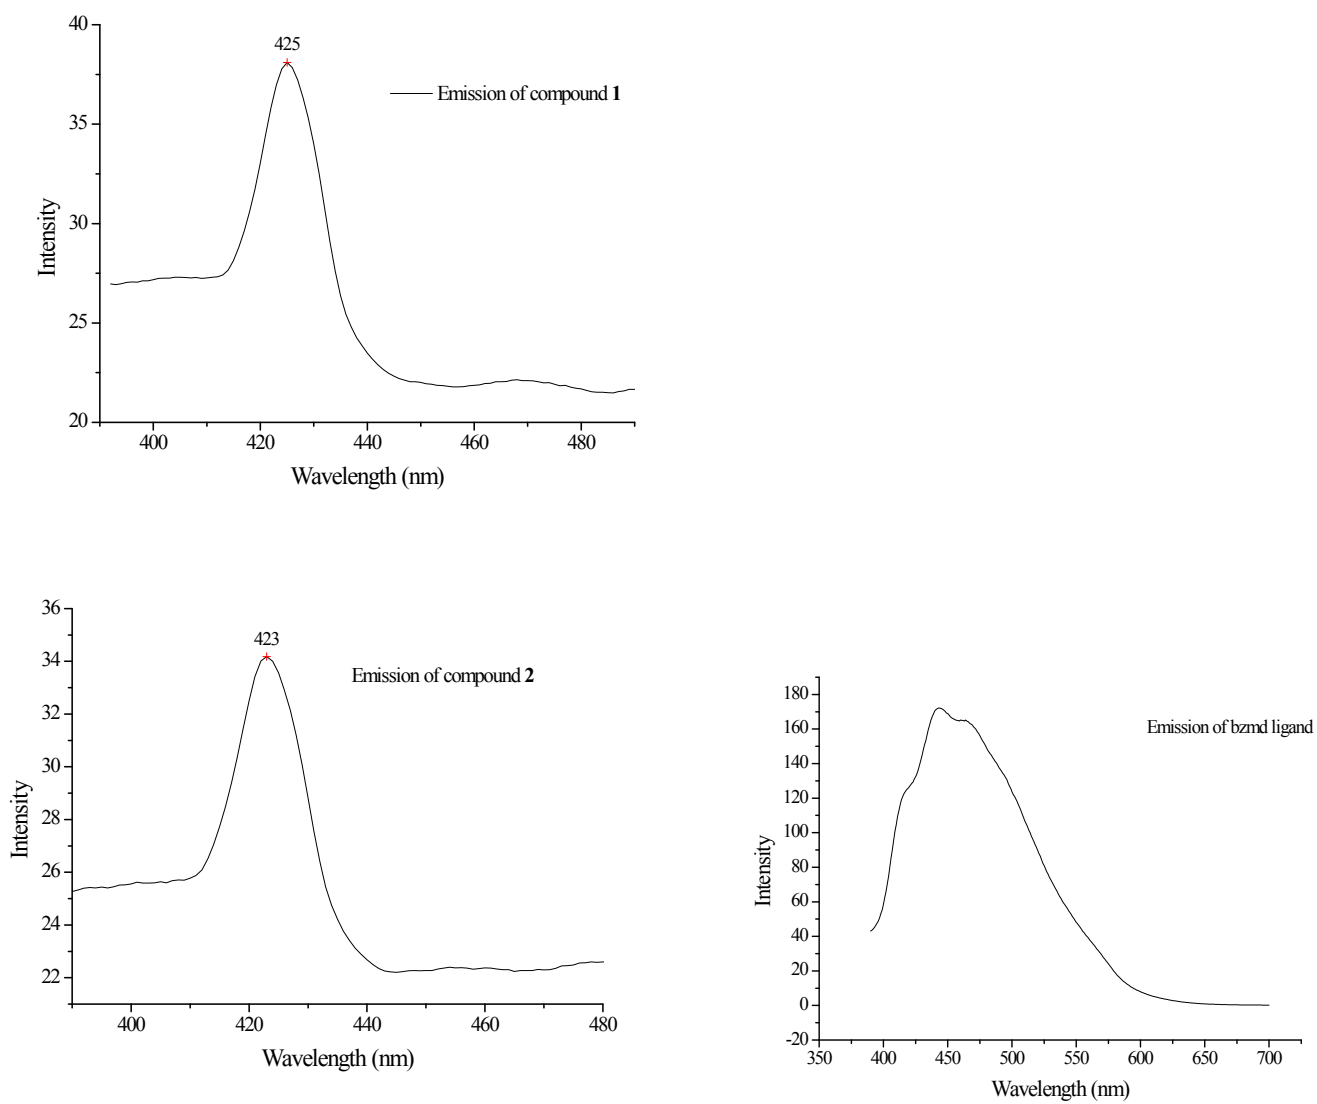

Fig. s10 The photoluminescence properties of compounds **1** and **2**.

References:

1. S. Q. Liu, Z. Shi, S. J. Dong, *Electroanalysis* 1998, **10** (13), 891-896.
